# Supplementary material for: Interleukin 21 Controls mRNA and MicroRNA Expression in CD40-Activated Chronic Lymphocytic Leukemia Cells
Source: PubMed Central journal article supplement (PMC4549109; doi:10.1371/journal.pone.0134706), 2015-08-25

# S1 Fig

GSE50572

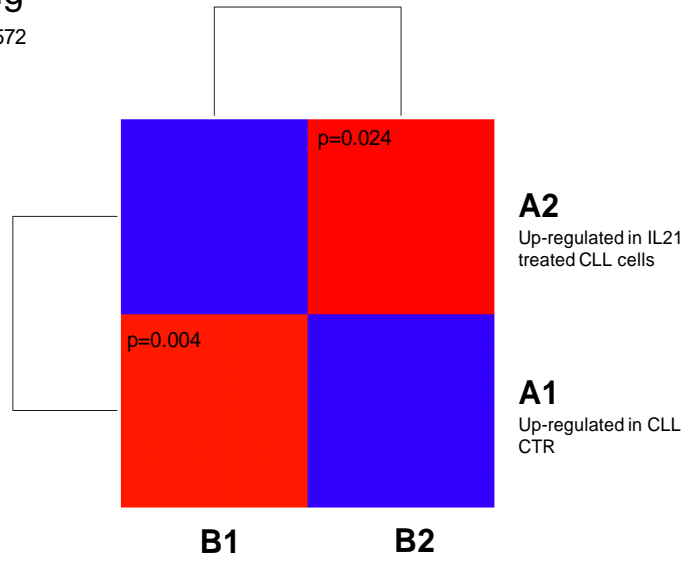

GSE50572 Up-regulated in CTR  
GSE50572 Up-regulated in IL21 treated cells

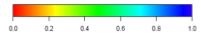

GSE8685

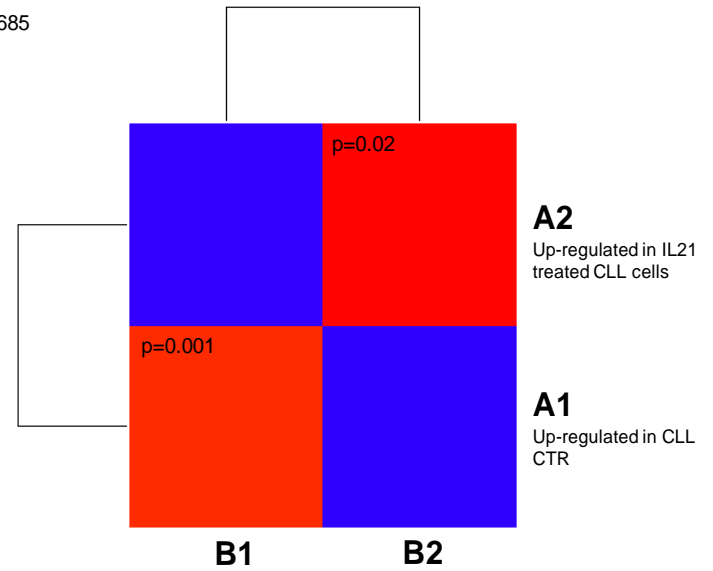

GSE8685 Up-regulated in CTR  
GSE8685 Up-regulated in IL21 treated cells

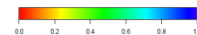

GSE2059

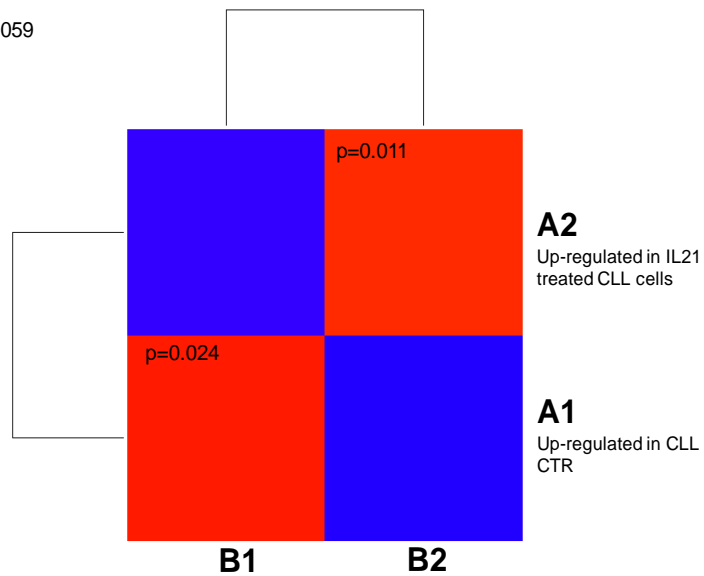

GSE2059 Up-regulated in CTR  
GSE2059 Up-regulated in IL21 treated cells

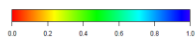

GSE19198

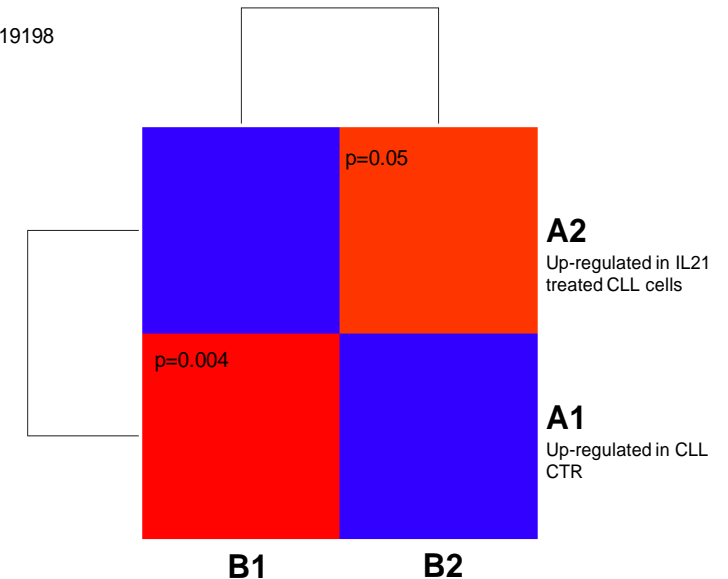

GSE19198 Up-regulated in CTR  
GSE19198 Up-regulated in IL21 treated cells

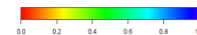

Supplement: pone.0134706.s001.pdf [file pone.0134706.s001.pdf]
