# Supplementary material for: Interleukin 21 Controls mRNA and MicroRNA Expression in CD40-Activated Chronic Lymphocytic Leukemia Cells
Source: PubMed Central journal article supplement (PMC4549109; doi:10.1371/journal.pone.0134706), 2015-08-25

S2 Fig

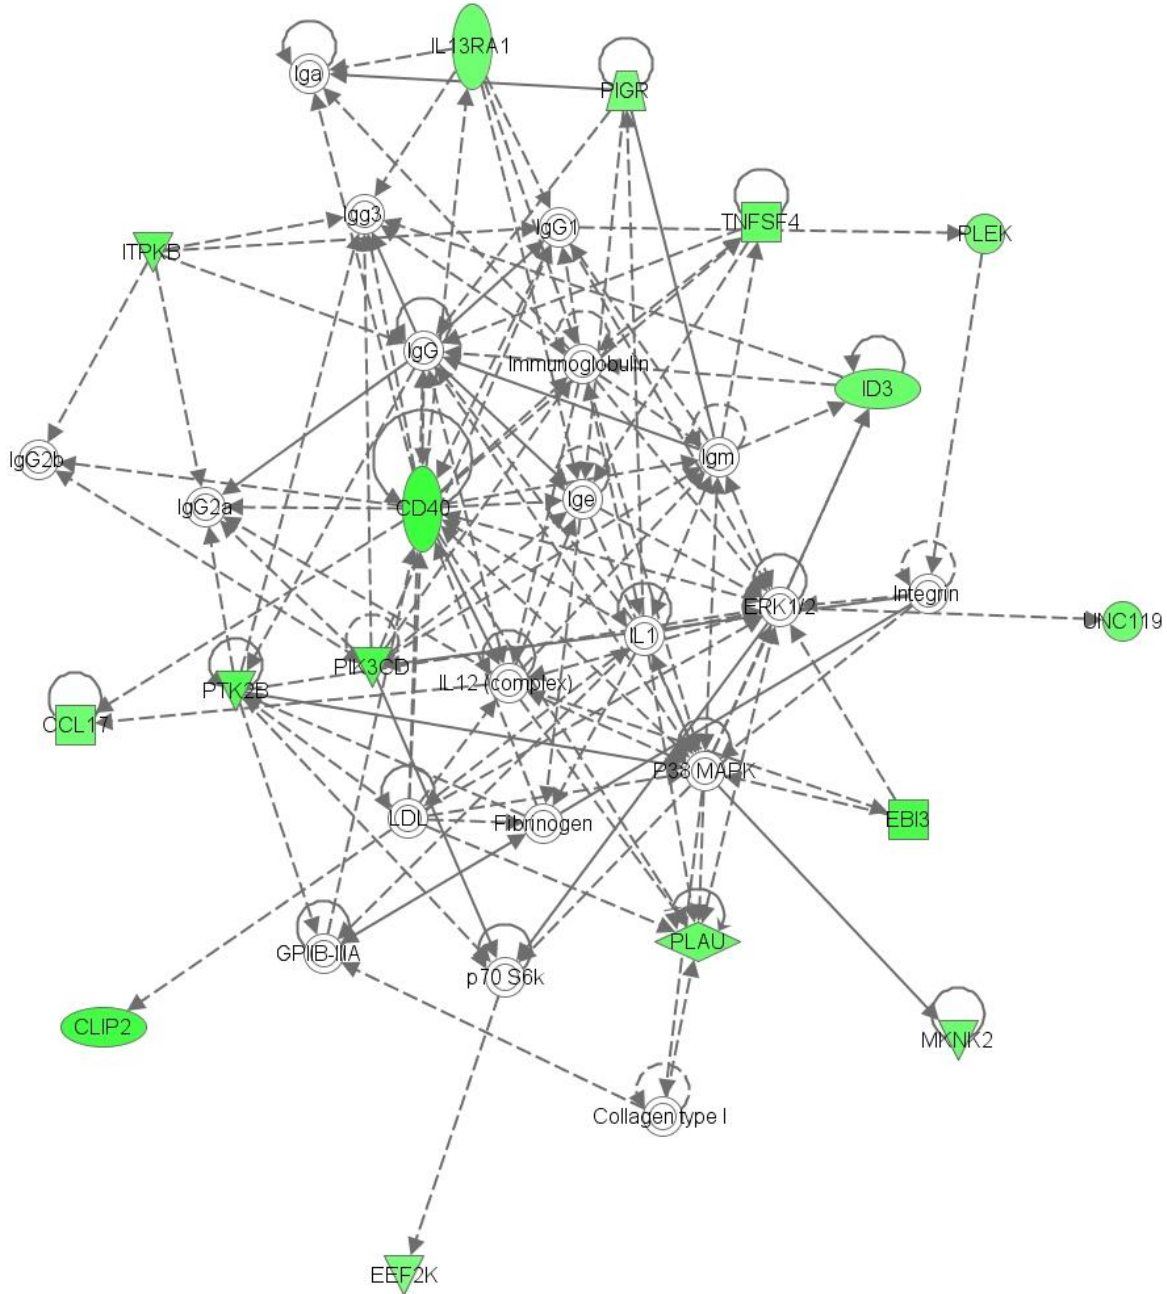

Supplement: pone.0134706.s002.pdf [file pone.0134706.s002.pdf]
