# Supplementary material for: Interleukin 21 Controls mRNA and MicroRNA Expression in CD40-Activated Chronic Lymphocytic Leukemia Cells
Source: PubMed Central journal article supplement (PMC4549109; doi:10.1371/journal.pone.0134706), 2015-08-25
Supplement: pone.0134706.s006.pdf [file pone.0134706.s006.pdf]

S2 Table

| ID | Molecules in Network                                                                                                                                                                                                                                                                                                                                                                                                                                                                                                                                                                                | Score | Focus Molecules | Top Functions                                                                                                |
|----|-----------------------------------------------------------------------------------------------------------------------------------------------------------------------------------------------------------------------------------------------------------------------------------------------------------------------------------------------------------------------------------------------------------------------------------------------------------------------------------------------------------------------------------------------------------------------------------------------------|-------|-----------------|--------------------------------------------------------------------------------------------------------------|
| 1  | <b>ADAM8</b> , Alpha Actinin, Alpha catenin, <b>AMPD3</b> , <b>ARHGAP17</b> , Cadherin, <b>CDC42EP4</b> , <b>DNASE1L3</b> , Erm,F Actin, <b>FNBP1</b> , Fructose 2,6 Bisphosphatase, <b>GNE</b> , <b>HCN3</b> , HERC1, Il8r, <b>KMO</b> , <b>MARCH1</b> , <b>MARCKS</b> , <b>MARCKSL1</b> , Mlc, <b>OAS3</b> , Pak, <b>PFKFB3</b> , <b>PFKL</b> , Rho gdi, <b>RHOG</b> , Rock, <b>SNN</b> , <b>SRGN</b> , <b>ST3GALS</b> , <b>TNF</b> , <b>TST</b> , Ube3, <b>UBQLN2</b>                                                                                                                            | 36    | 23              | Lipid Metabolism, Small Molecule Biochemistry, Hematological System Development and Function                 |
| 2  | <b>ALCAM</b> , <b>BATF</b> , <b>CLIP2</b> , <b>DUSP5</b> , Fascin, <b>FCER2</b> , glutathione peroxidase, <b>GPX4</b> , Hat, <b>HERC5</b> , <b>ICOSLG</b> , IgG2b, IgG2c, Ikk (family), <b>IL12 receptor</b> , <b>ITPKB</b> , Mhc class ii, <b>MUC1</b> , <b>NFkB (complex)</b> , NFkB (family), Nfkb-RelA, Nfkb1-RelA, NFKBID, <b>NFKBIE</b> , <b>NFKBIZ</b> , peptidase, <b>PRDX2</b> , <b>PTPN2</b> , <b>RHOH</b> , RNF19B, <b>SLC2A6</b> , sphingomyelinase, <b>Stat3-Stat3</b> , <b>TNFRSF13B</b> , <b>VMP1</b>                                                                                | 33    | 20              | Humoral Immune Response, Protein Synthesis, Cellular Development                                             |
| 3  | Adaptor protein 1, <b>ALDH2</b> , <b>CD58</b> , <b>CD83</b> , <b>DTX3L</b> , <b>EBI3</b> , <b>ERK1/2</b> , FCGR1A/2A/3A, <b>HLA-DOA</b> , <b>HLA-DOB</b> , <b>HLA-DPB1</b> , IFN alpha/beta, IFN TYPE 1, Ifnar, Iga, Igf, <b>IL12A</b> , <b>IL13RA1</b> , <b>KLF13</b> , <b>LIMS1</b> , <b>MHC</b> ,MHC Class I (complex), <b>MHC Class II</b> (complex), <b>MMD</b> , <b>PARP9</b> , PTPase, Rab5, <b>RUFY3</b> , <b>SH2B3</b> , <b>STAT3/5</b> , Tlr, TLR2/3/4/9, <b>TYK2</b> , <b>UCP2</b> , <b>UNC119</b>                                                                                       | 31    | 19              | Endocrine System Disorders, Gastrointestinal Disease, Immunological Disease                                  |
| 1  | <b>ACP5</b> , Ap1, <b>BATF3</b> , <b>CAPG</b> , <b>CD68</b> , <b>CEACAM1</b> (includes others), <b>CLNK</b> , Collagen type I, Collagen(s), Ctpb, <b>CTH</b> , <b>DDX21</b> , <b>EBNA1BP2</b> , <b>FUT7</b> , <b>GNL3</b> , <b>HMBS</b> , <b>HNRNPAB</b> , LDL, <b>LYAR</b> , Mek, <b>MTHFD2</b> , <b>NAGK</b> , <b>NHP2</b> , <b>NOLC1</b> , NOP56, <b>NR4A2</b> , Pdgf (complex), PDGF BB, <b>PI3K (complex)</b> , <b>PSAT1</b> , <b>PUS7</b> , <b>RANBP1</b> , RCC1, STAT5a/b, Tgf beta                                                                                                          | 46    | 24              | RNA Post-Transcriptional Modification, Cellular Assembly and Organization, Cellular Function and Maintenance |
| 2  | <b>60S ribosomal subunit</b> , <b>BOP1</b> , Calmodulin, CD3, Ck2, Creb, ERK, estrogen receptor, Hdac, <b>HEATR3</b> , HISTONE, Hsp90, <b>HUWE1</b> , <b>IFRD2</b> , <b>LY9</b> , <b>MYC</b> , <b>NETO2</b> , <b>NME1</b> (includes EG:18102), <b>ODC1</b> , <b>Pde</b> , <b>PDE4B</b> , <b>PDE7A</b> , <b>PNP</b> , <b>PPA1</b> , <b>Ribosomal 40s subunit</b> , RNA polymerase I, Rnr, <b>RPL6</b> , <b>RPL29</b> (includes EG:367874), <b>RPS7</b> , <b>RPS15</b> , <b>STOM</b> , <b>VAMP1</b> , <b>WARS</b> , <b>WDR12</b>                                                                      | 36    | 21              | RNA Post-Transcriptional Modification, Infectious Disease, Cardiovascular Disease                            |
| 3  | <b>ABCG1</b> , <b>CCL3</b> , <b>CCL4</b> , <b>CCL3L1/CCL3L3</b> , <b>CD69</b> , <b>CXCL9</b> , <b>CXCL10</b> , <b>HLA-DMB</b> , HLA-DR, <b>HRSP12</b> , <b>IFIT2</b> , Ifn, IFN alpha/beta, IFN Beta, Ifn gamma, IFN TYPE 1, IgG2a, <b>IL10RA</b> , IL12 (complex), <b>IL28RA</b> , <b>LTB</b> , <b>lymphotoxin</b> , <b>MIP1</b> , NCOR-LXR-Oxysterol-RXR-9 cis RA, <b>NFkB (complex)</b> , Nr1h, <b>PECAM1</b> , PI3K (family), <b>SLC2A5</b> , <b>SLC7A1</b> , <b>ST3GAL1</b> , Tlr, <b>Tnf</b> , <b>TYROBP</b> , <b>WNT10A</b>                                                                  | 33    | 19              | Cell-To-Cell Signaling and Interaction, Cellular Movement, Hematological System Development and Function     |
| 4  | <b>ACACA</b> , <b>ACAT1</b> , <b>AK1</b> , <b>Akt</b> , <b>ALOX5AP</b> , AMPK, C1QBP, Cyclin A, <b>DDIT4</b> , E2f, <b>ENO1</b> , <b>EXOSC5</b> , <b>FASN</b> , FSH, Growth hormone, hCG, hexokinase, <b>HK2</b> , Insulin, <b>LDHA</b> , Lh, MAP2K1/2, <b>MIF</b> , MTORC1, <b>PA2G4</b> , <b>PAICS</b> , PP2A, <b>PPAT</b> , PRKAA, <b>RAPGEF3</b> , Rb, <b>SH3PXD2A</b> , <b>SLC29A1</b> , <b>STRA13</b> , T3-TR-RXR                                                                                                                                                                             | 32    | 19              | Carbohydrate Metabolism, Lipid Metabolism, Nucleic Acid Metabolism                                           |
| 1  | APC (complex), <b>CDC45</b> , <b>CDC25A</b> , <b>CDT1</b> , <b>CHEK1</b> , <b>CKS2</b> , Collagen Alpha1, <b>Cyclin A</b> , Cyclin B, <b>DTL</b> , <b>DUT</b> , <b>E2F1</b> , <b>E2f</b> , <b>FEN1</b> , <b>GAS6</b> , <b>HAMP</b> , <b>HNRNPA1</b> , <b>LGALS1</b> , <b>MAD2L1</b> , <b>MCM4</b> , <b>MCM5</b> , <b>MCM6</b> , <b>MCM7</b> , <b>Mcm</b> , <b>MCM10</b> (includes EG:307126), <b>NCAPG</b> , NFkB (complex), <b>ORC1</b> (includes EG:18392), <b>ORC6</b> (includes EG:23594), <b>PTP4A3</b> ,Rb, <b>SLC25A10</b> , <b>TIMP2</b> (includes EG:21858), <b>TSC22D1</b> , <b>UBE2C</b> | 66    | 27              | DNA Replication, Recombination, and Repair, Cell Cycle, Cancer                                               |
| 2  | <b>ADAM15</b> , <b>Akt</b> , <b>BUB1</b> (includes EG:100307076), CASP7, caspase, CD3, <b>CDCA5</b> , <b>CDCA7</b> , <b>CKS1B</b> , <b>DLK1</b> , <b>DSCC1</b> , <b>DUSP3</b> , <b>EGR2</b> , ERK, <b>ERK1/2</b> , Focal adhesion kinase, FSH,hCG, Histone h3, <b>HMMR</b> , Igm, Insulin, Jnk, <b>KISS1R</b> , Lh, <b>LPIN1</b> , Mek, <b>NME4</b> , P38 MAPK, <b>PITPNA</b> , Pkc(s), <b>SCARB1</b> , <b>TRIP13</b> , <b>UHRF1</b> , Vegf                                                                                                                                                         | 38    | 18              | Cancer, Lipid Metabolism, Molecular Transport                                                                |
| 3  | <b>ABCA9</b> , <b>ACOT7</b> , ARID4A, ARIH2, ARPC4, <b>ARPC5L</b> , <b>C16orf59</b> , <b>CENPN</b> , <b>CLIP3</b> , DEDD, <b>DOCK7</b> , <b>EXO1</b> (includes EG:26909), FANCF, FANCL, <b>FEN1</b> , FEZ2, <b>GINS2</b> , <b>GINS3</b> , GINS4, GPSM1, <b>IMPDH1</b> , KPNA4, LNX2, LRRC20, MARCH5, MGRN1, MSH3 (includes EG:17686), PNMA2, RECQL, <b>RENBP</b> , RNF144B, RPP14, <b>UBC</b> , <b>UBE2T</b> , ZBED1                                                                                                                                                                                | 31    | 15              | Cellular Assembly and Organization, Cellular Function and Maintenance, Post-Translational Modification       |
