# Supplementary material for: Interleukin 21 Controls mRNA and MicroRNA Expression in CD40-Activated Chronic Lymphocytic Leukemia Cells
Source: PubMed Central journal article supplement (PMC4549109; doi:10.1371/journal.pone.0134706), 2015-08-25
Supplement: pone.0134706.s008.pdf [file pone.0134706.s008.pdf]

**S4 Table:** miRNA validation

| miRNA ID               | <i>Arrays</i>   | Technical validation<br>by RT-qPCR |                       | Technical validation<br>by RT-qPCR |                       | Normal B cells<br>RT-qPCR |                       |
|------------------------|-----------------|------------------------------------|-----------------------|------------------------------------|-----------------------|---------------------------|-----------------------|
|                        | Fold<br>change* | Fold<br>change*                    | Parametric<br>p-value | Fold<br>change*                    | Parametric<br>p-value | Fold<br>change*           | Parametric<br>p-value |
| <b>hsa-miR-663b</b>    | 1.47            | 3.02                               | 0.00357               | 2.26                               | 0.000941              | 1.42                      | 0.0077                |
| <b>hsa-miR-125b-1*</b> | 0.73            | 0.36                               | 0.00405               | 0.42                               | 0.00703               | 0.93                      | 0.202                 |
| <b>hsa-miR-708</b>     | 0.70            | 0.43                               | 0.0352                | 0.48                               | 0.00936               | 1.11                      | 0.588                 |

\*IL21/CTR
