# Supplementary material for: Interleukin 21 Controls mRNA and MicroRNA Expression in CD40-Activated Chronic Lymphocytic Leukemia Cells
Source: PubMed Central journal article supplement (PMC4549109; doi:10.1371/journal.pone.0134706), 2015-08-25
Supplement: pone.0134706.s009.pdf [file pone.0134706.s009.pdf]

**S5 Table:** miRNAs potentially involved in expression regulation of genes belonging to identified modules

| miRNA ID        | No. genes anti-correlated | modules    |           |           |
|-----------------|---------------------------|------------|-----------|-----------|
|                 |                           | ME pink    | MEgreen   | MEblue    |
| hsa-miR-296-3p  | 64                        | 47         | 12        | 5         |
| hsa-miR-125b-1* | 51                        | 21         | 18        | 12        |
| hsa-miR-1225-5p | 35                        | 14         | 19        | 2         |
| hsa-miR-1228*   | 25                        | 16         | 6         | 3         |
| hsa-miR-326     | 11                        | 3          | 5         | 3         |
| hsa-miR-92a-1*  | 10                        | 7          | 2         | 1         |
| hsa-miR-1205    | 6                         | 1          | 4         | 1         |
| hsa-miR-130a    | 5                         | 2          | 2         | 1         |
| hsa-miR-381     | 5                         | 2          | 2         | 1         |
| hsa-miR-663b    | 28                        | 27         | 1         | -         |
| hsa-miR-92a     | 6                         | 6          | -         | -         |
| hsa-miR-24      | 5                         | 4          | 1         | -         |
| hsa-miR-22      | 4                         | -          | 3         | 1         |
| hsa-miR-657     | 3                         | 3          | -         | -         |
| hsa-miR-922     | 3                         | 2          | -         | 1         |
| hsa-miR-943     | 3                         | 3          | -         | -         |
| hsa-miR-1204    | 3                         | 2          | 1         | -         |
| hsa-miR-7       | 2                         | -          | -         | 2         |
| hsa-miR-25      | 2                         | 2          | -         | -         |
| hsa-miR-193b    | 2                         | 1          | 1         | -         |
| hsa-miR-652     | 2                         | -          | 2         | -         |
| hsa-miR-708     | 2                         | -          | 2         | -         |
| hsa-miR-874     | 2                         | 1          | 1         | -         |
| hsa-miR-1270    | 2                         | 2          | -         | -         |
| hsa-miR-101     | 1                         | 1          | -         | -         |
| hsa-miR-107     | 1                         | 1          | -         | -         |
| hsa-miR-181c    | 1                         | 1          | -         | -         |
| hsa-miR-193a-5p | 1                         | -          | 1         | -         |
| hsa-miR-331     | 1                         | -          | 1         | -         |
| hsa-miR-542-5p  | 1                         | 1          | -         | -         |
| hsa-miR-646     | 1                         | -          | -         | 1         |
| hsa-miR-720     | 1                         | -          | 1         | -         |
| hsa-miR-1323    | 1                         | 1          | -         | -         |
| <b>Total</b>    | <b>290</b>                | <b>171</b> | <b>85</b> | <b>34</b> |

(cut-off -0.3 correlation)
